# Supplementary material
Source: Research Square preprint supplement (doi:10.21203/rs.3.rs-10146729/v1)
Supplement: Supplementary file 1 [file 29dcb5cd7f9873ebdfbc93a3.docx]

**The community patterns and** **assembly mechanism varied in** **eukaryotic microorganisms with different cell sizes**

Wei Hu1, Yumei Qian2,Zenghui zhang3,Xiaofan Zhao4, Xinxin Lai5, Kexin Zhang6, Pengfei Yang1, Zongcan Yang7*, hanghang han3*

1College of Tobacco Science and Engineering, Zhengzhou University of Light Industry, Zhengzhou, China;

2Technology Center, China Tobacco Guangxi Industrial Co., Ltd., Nanning, China;

3Technology Center, China Tobacco Shaanxi Industrial Co., Ltd, Xian, China

4Technology Center, China Tobacco Hebei Industrial Co., Ltd., Shijiazhuang, China;

5Henan Province Engineering Technology Research Center of Water Environment and Health, Zhengzhou University of Industrial Technology, Zhengzhou, China;

6School of Geography and Tourism, Qilu Normal University, Ji'nan, China;

7Technology Center, China Tobacco Henan Industrial Co., Ltd., Zhengzhou, Henan, China;

*** Corresponding author, e-mail:** **hanhanghang88@163.com and yangzongcan666@163.com**


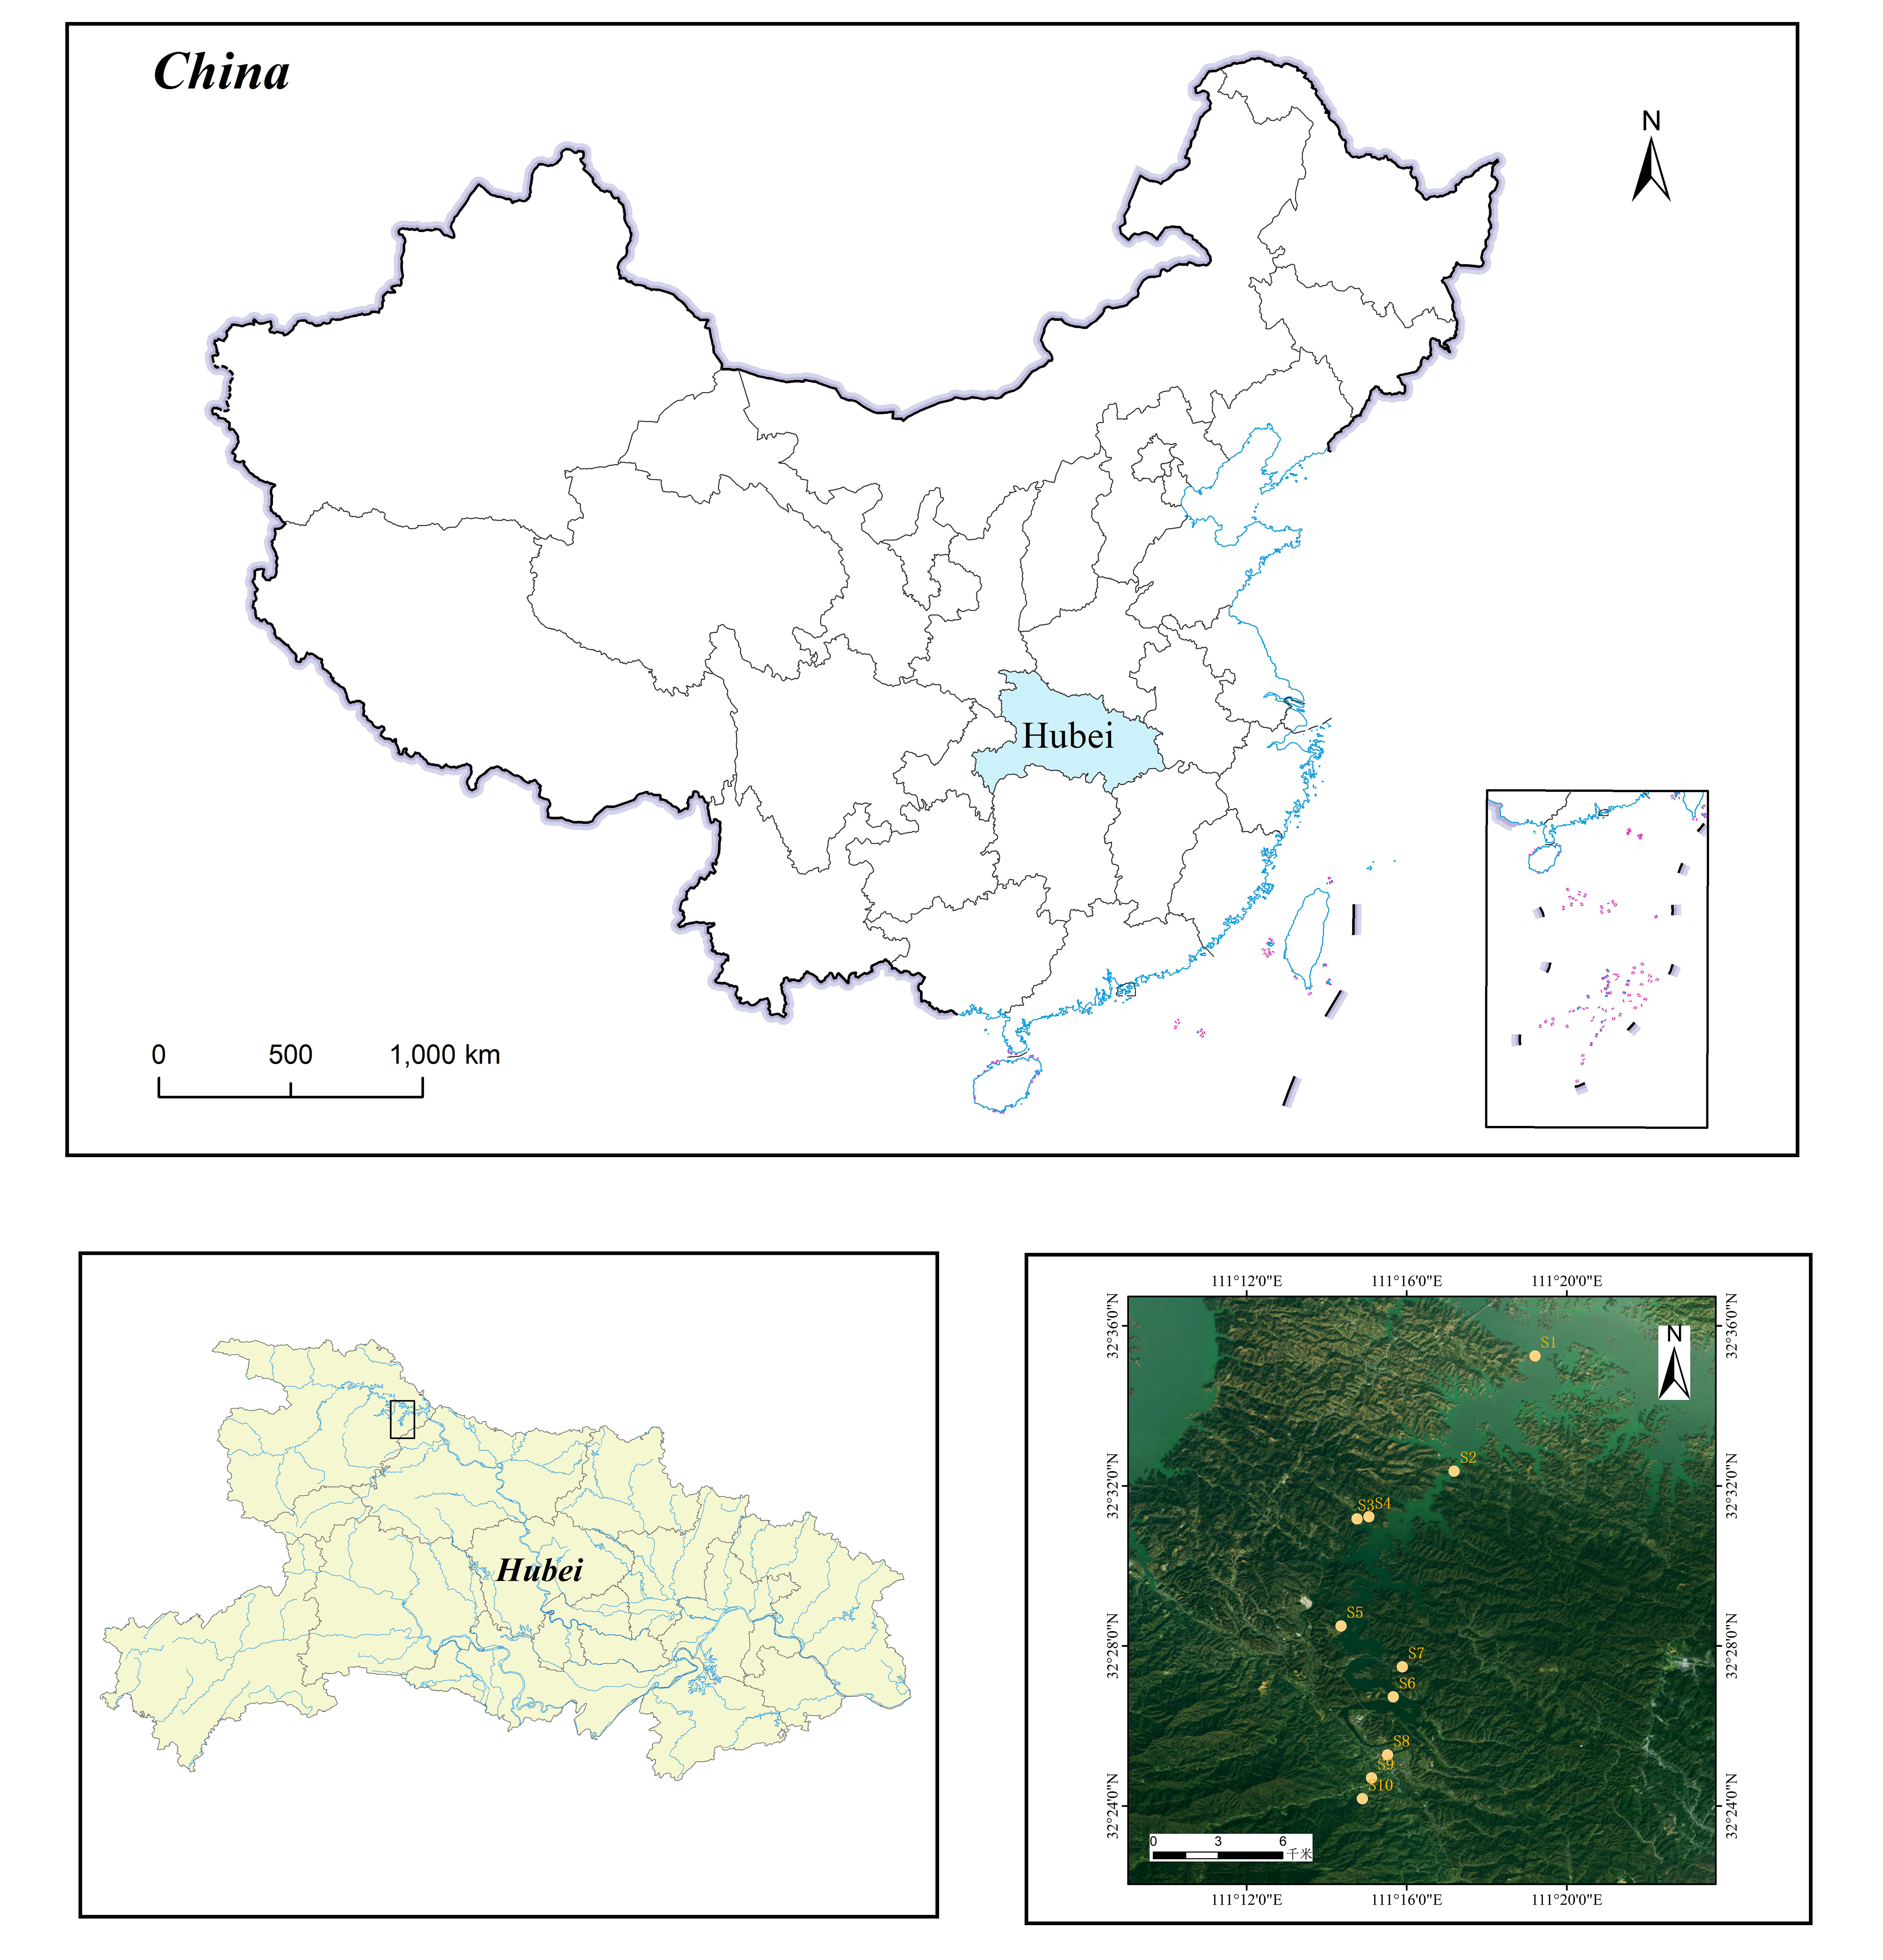


**Fig. S1** Sampling map in the river


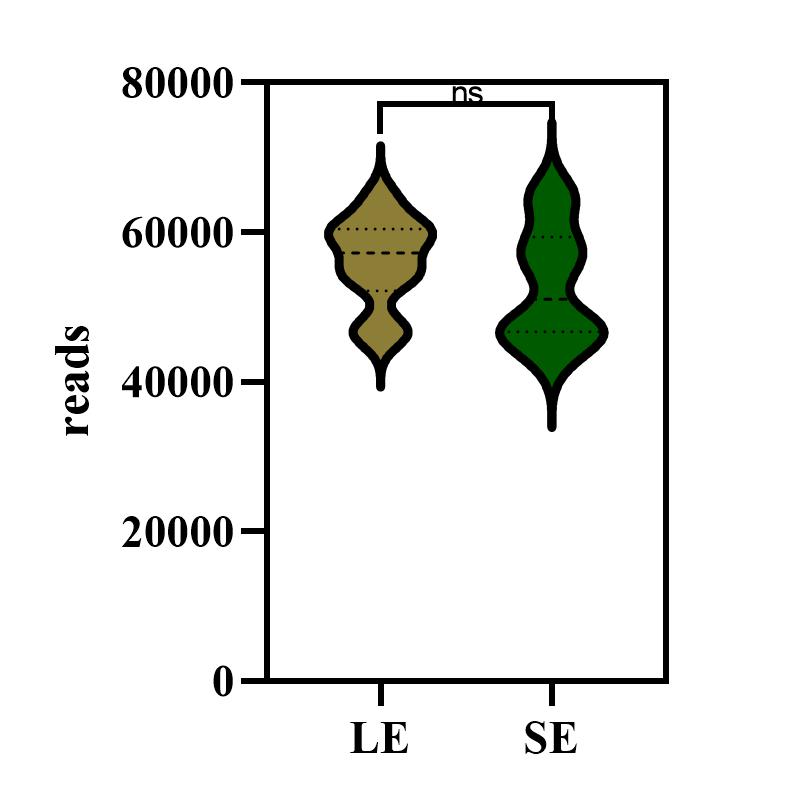


**Figure S2** the reads of UB and LB


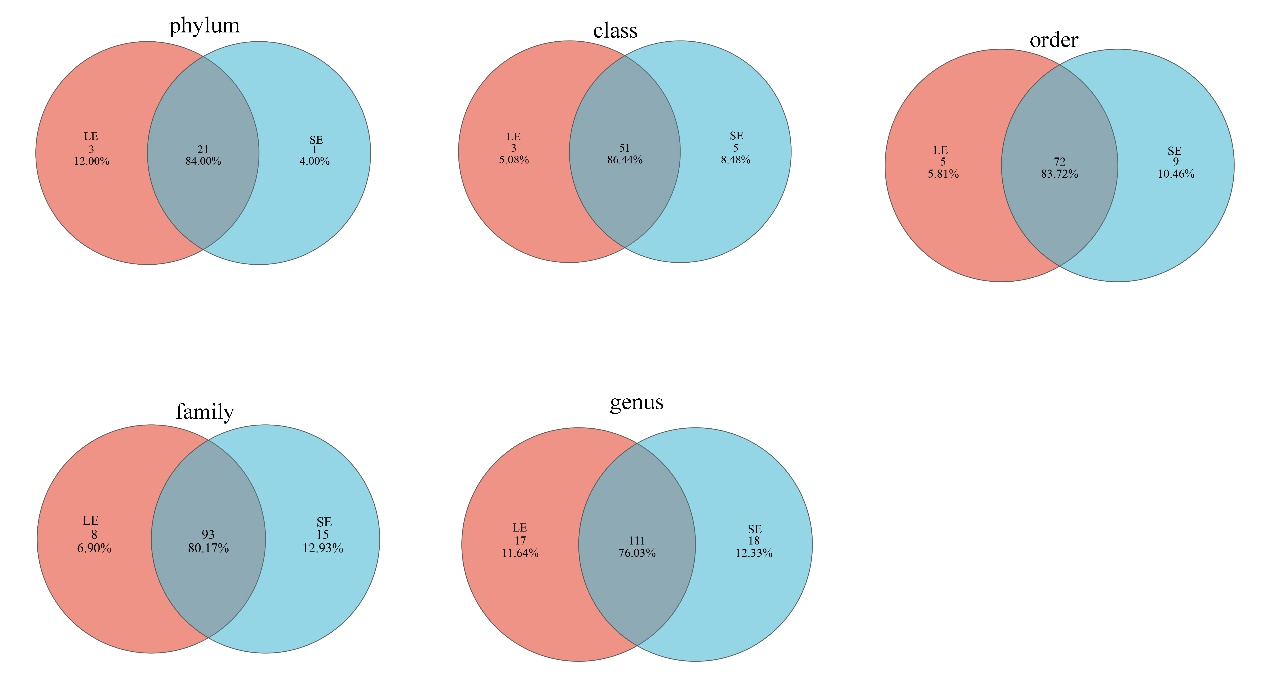


Figure S3 Venn diagram of the composition of LE and SE groups at different classification levels

**Table S1** Summary of environmental factors of all samples

|  | Longitude | Latitude | T | PH | DO | TOC(mg/L) | IC(mg/L) | TC(mg/L) | TN(mg/L) | TP(mg/L) |
| --- | --- | --- | --- | --- | --- | --- | --- | --- | --- | --- |
| S1 | 111.320146 | 32.58745 | 15.4 | 7.855 | 7.9 | 2.95 | 23.76 | 26.73 | 0.7905 | 0.12 |
| S2 | 111.286451 | 32.53947 | 15.7 | 7.794 | 9.7 | 1.29 | 22.7 | 23.99 | 0.703 | 0.14 |
| S3 | 111.246043 | 32.51961 | 15.8 | 7.828 | 9.4 | 1.42 | 23.02 | 24.44 | 0.7589 | 0.14 |
| S4 | 111.2509881 | 32.52049 | 15.7 | 7.833 | 8.68 | 3.22 | 20.48 | 23.7 | 0.9309 | 0.2 |
| S5 | 111.239316 | 32.47499 | 15.6 | 7.905 | 8.2 | 2.43 | 20.92 | 23.35 | 0.8221 | 0.22 |
| S6 | 111.261116 | 32.44551 | 15.6 | 7.73 | 9.06 | 1.73 | 20.59 | 22.31 | 0.9637 | 0.24 |
| S7 | 111.264887 | 32.45797 | 15.7 | 7.948 | 9.8 | 1.3 | 21.25 | 22.55 | 1.14 | 0.45 |
| S8 | 111.258725 | 32.42137 | 15.5 | 7.795 | 9.85 | 1.15 | 14.71 | 15.86 | 1.09 | 0.39 |
| S9 | 111.252103 | 32.41176 | 15.6 | 7.88 | 9.16 | 1.6 | 13.88 | 15.48 | 1.23 | 0.44 |
| S10 | 111.248257 | 32.40311 | 15.7 | 7.92 | 8.4 | 2.14 | 12.64 | 14.77 | 1.11 | 0.42 |
